# Supplementary material
Source: bioRxiv or medRxiv preprint supplement (https://www.biorxiv.org/highwire/filestream/25686/field_highwire_adjunct_files/17/077701-7.pdf)

## Sustaining Proliferative Signaling

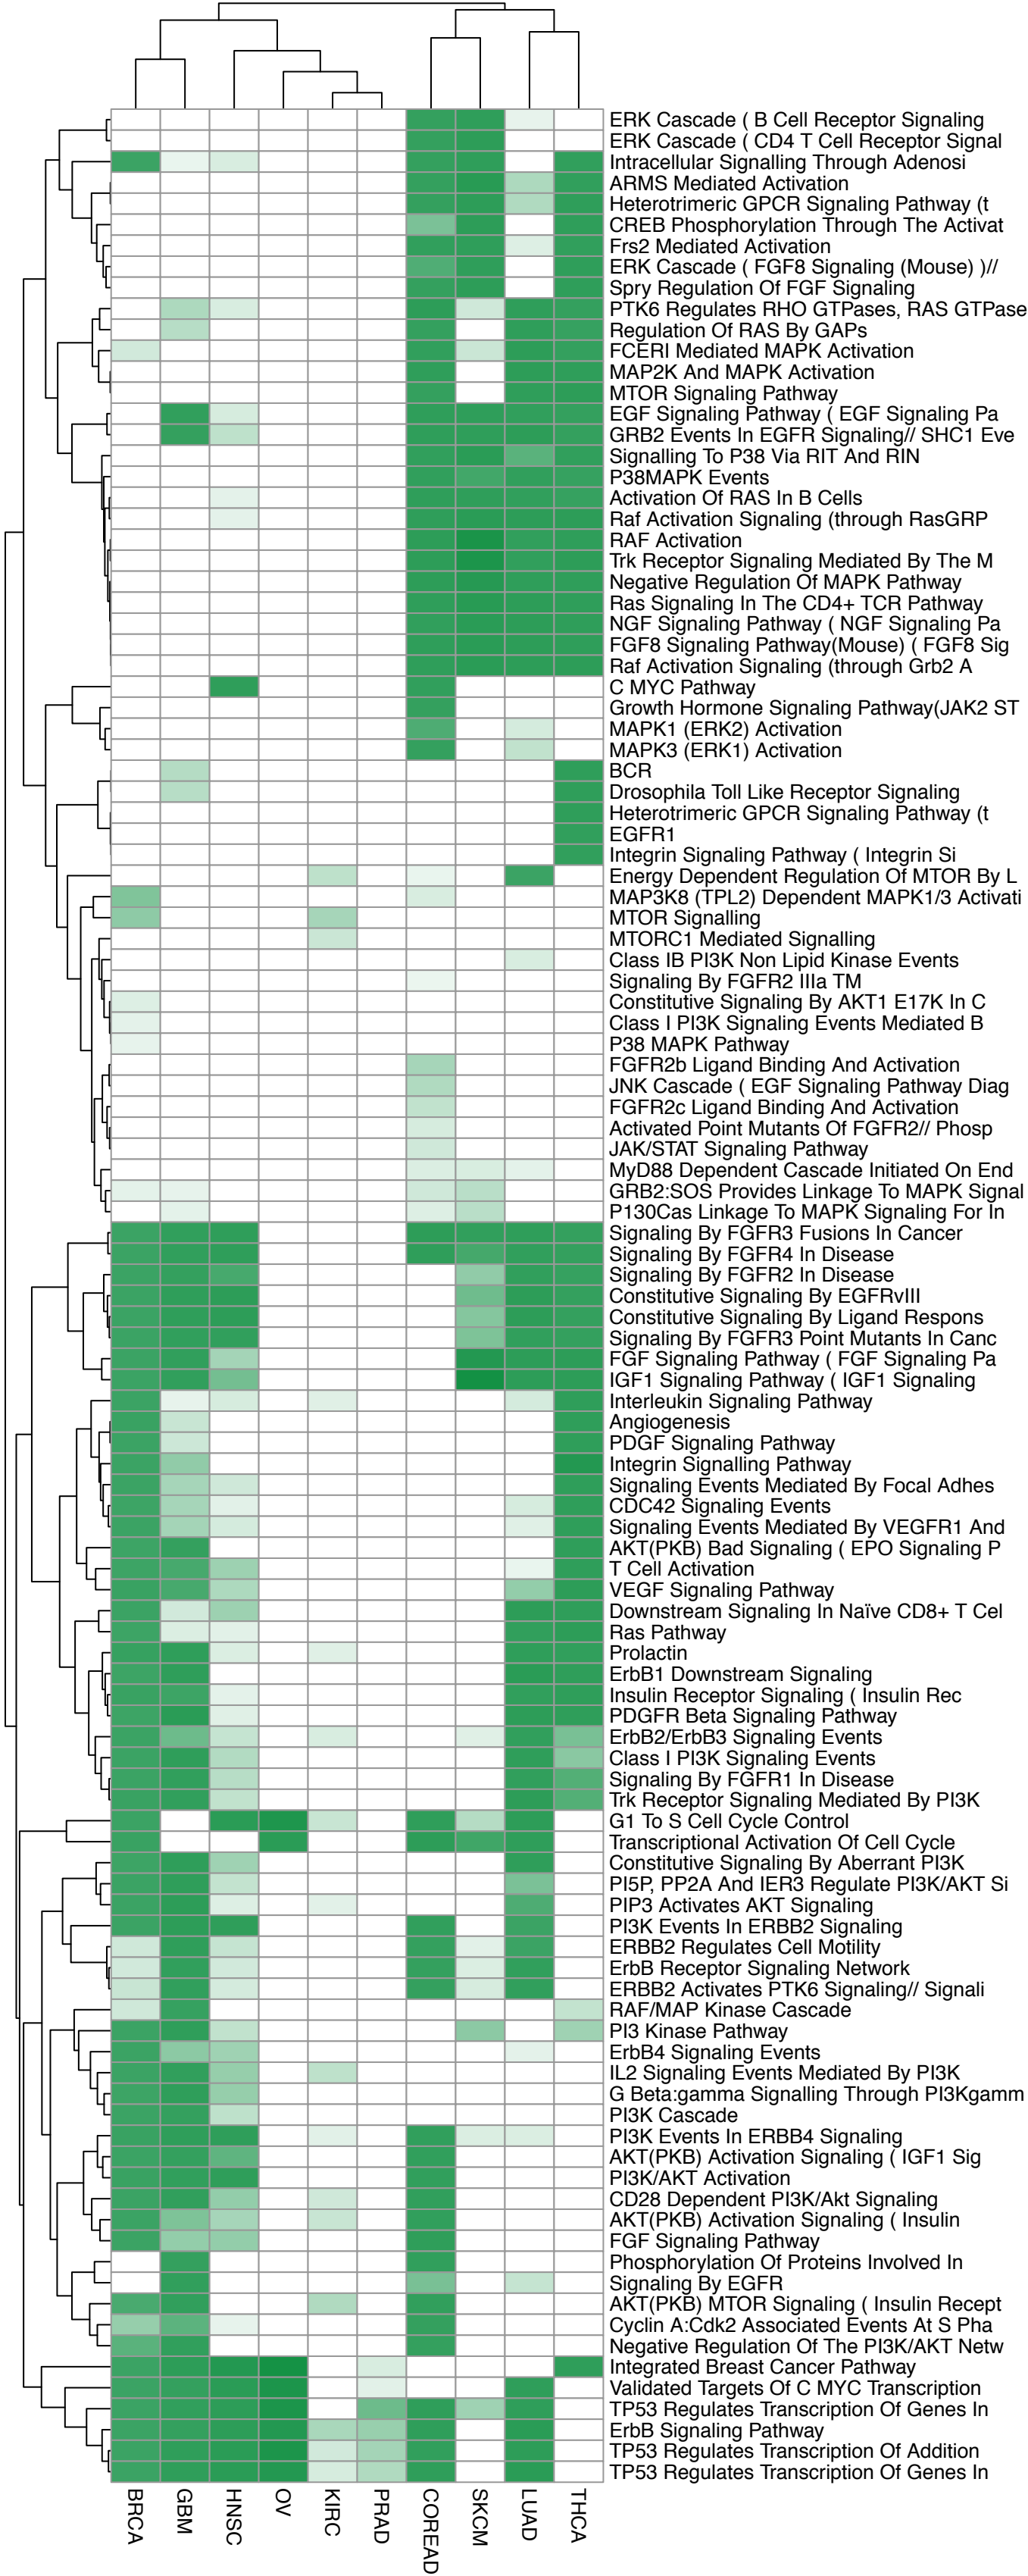

## Evading Growth Suppressors

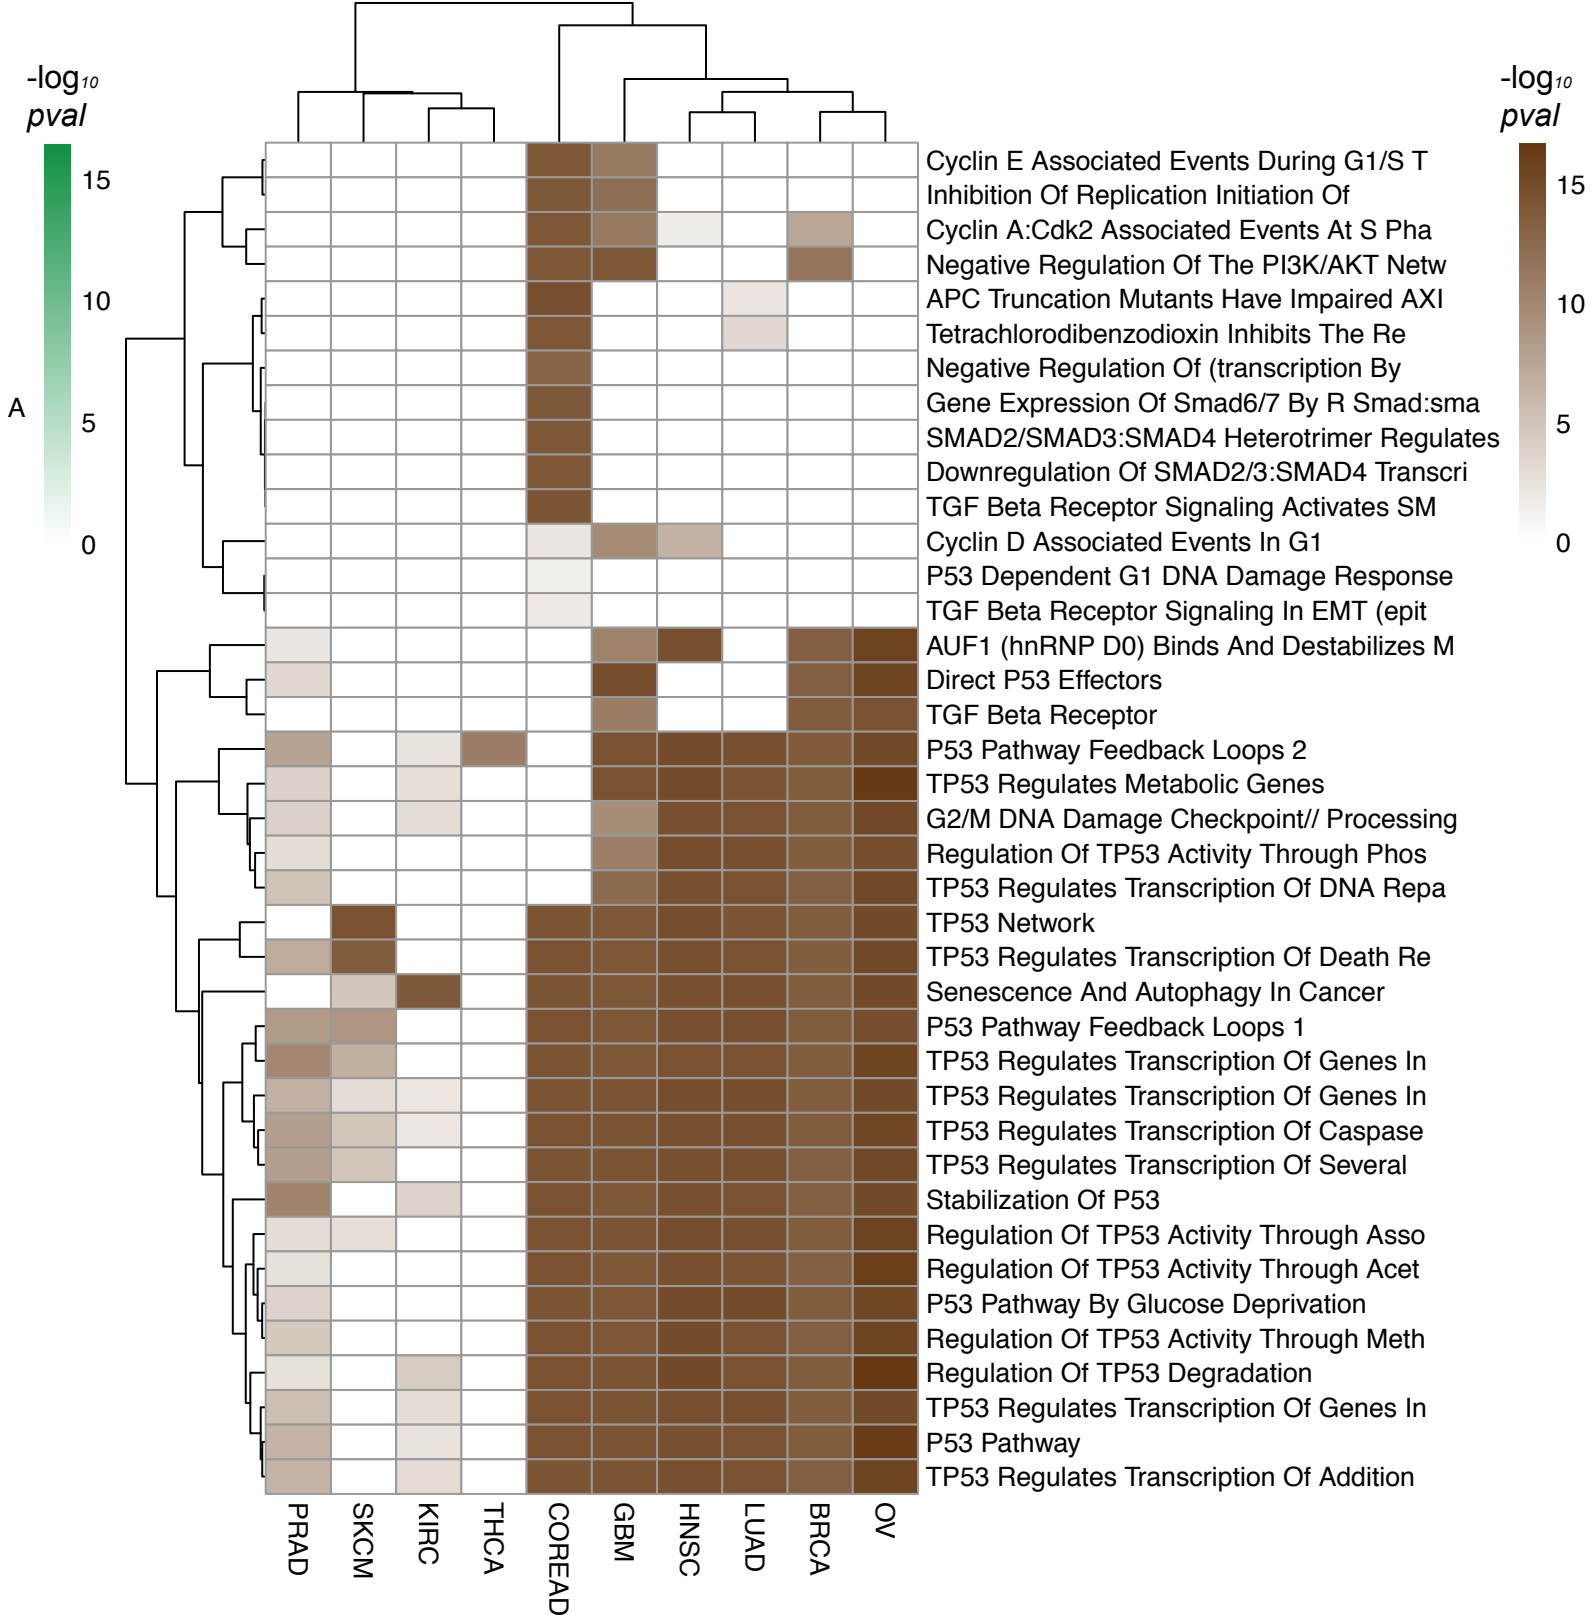

## Inducing Angiogenesis

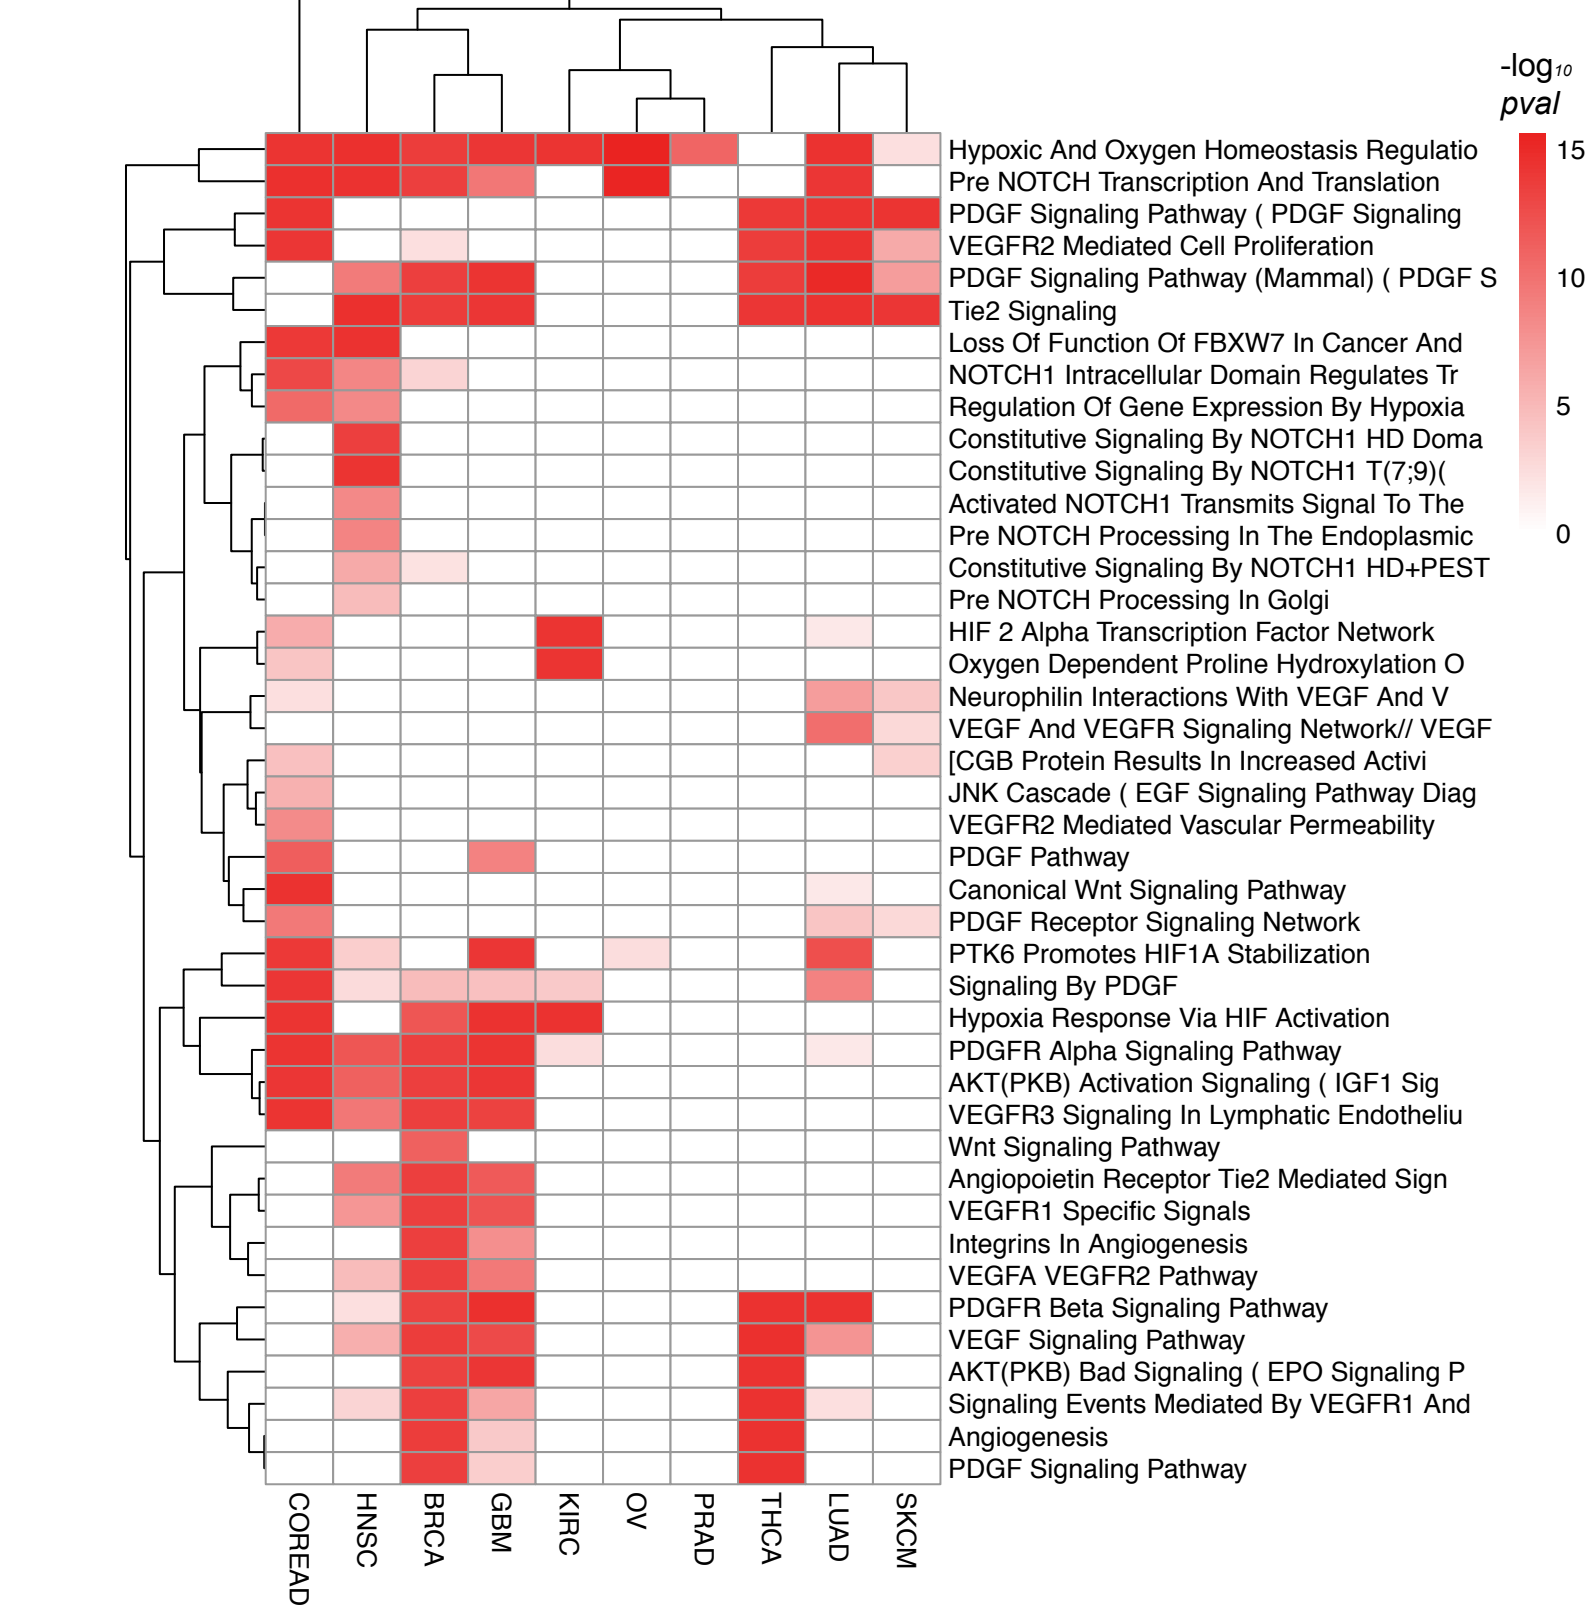

Supplement: Supplementary file [file 077701-7.pdf]
